# Supplementary material
Source: MDPI journal article supplement (https://www.mdpi.com/1996-1073/15/24/9443)
Supplement: s1 [file s1 › Supporting Information.pdf]

# **Construction of glutinous rice potpourri-like Mott–Schottky Ni/CeO<sub>2</sub> heterojunction nanosheets for robust electrochemical water reduction**

*Guangqiang Zhang<sup>#</sup>, Hong Su<sup>#</sup>, Yan Zhang<sup>\*</sup>*

Guangqiang Zhang and Hong Su equally contribute to this work.

Sichuan Engineering Research Center for Biomimetic Synthesis of Natural Drugs,  
School of Life Science and Engineering, Southwest Jiaotong University, Chengdu, Sichuan  
610031, China

E-mail: zyzw@swjtu.edu.cn

## **Experimental Section**

### **Materials and Chemicals**

Pyromellitic acid hydrate ( $C_{10}H_6O_8$ , >98% Aladdin), cerium nitrate hexahydrate ( $Ce(NO_3)_3 \cdot 6H_2O$ , 99.2% Aladdin), The Nickel (II) acetate ( $Ni(CH_3COO)_2 \cdot 4H_2O$ , 99.2%), Urea ( $CH_4N_2O$ , 98%) and Nafion (5 wt%) were purchased from Shanghai Macklin Biochemical Company. Pt/C (10 wt %) was purchased from bidepharm. Deionized water used throughout all experiments was purified through a Millipore system.

All chemicals and reagents were used as received without further purification.

### **Synthesis of Ce-based coordination polymer NSs**

$Ce(NO_3)_3 \cdot 6H_2O$  (434.0 mg), Pyromellitic acid hydrate (254.0 mg) were dissolved into 20 mL ethanol with magnetic stirring for 10 min to obtain a homogeneous solution. Subsequently, the mixture was transferred into a 50 mL Teflon-lined stainless steel autoclave and heated at 80 °C for 1 h. Finally, after the autoclave cooled down to room temperature, the resulting precursor was successively washed with deionized water and ethanol several times, and then dried overnight in an oven at 60 °C.

### **Synthesis of NiO/CeO<sub>2</sub> NSs**

The as-prepared Ce-based coordination polymer precursor was uniformly mixed with  $Ni(CH_3COO)_2 \cdot 4H_2O$  at a mass ratio of 1:3. Subsequently, the mixture was annealed in air at 600 °C for 120 min to obtain NiO/CeO<sub>2</sub> NSs.

### **Synthesis of Ni/CeO<sub>2</sub> HJ-NSs**

A glutinous rice potpourri-like Ni/CeO<sub>2</sub> HJ-NSs via a scalable urea reduction reaction. Briefly, the corresponding precursor and urea were separately placed in two quartz tubes which were concatenated. The urea was placed on an alumina boat in the lower temperature region of the tube furnace and the NiO/CeO<sub>2</sub> NSs were placed in an upside down position on another alumina boat at the center and heated to 800 °C for 1 h with a ramping rate of 10 °C min<sup>-1</sup> under Ar atmosphere. Through the reduction selectivity of urea, NiO was specifically reduced to metallic Ni and CeO<sub>2</sub> did not change. After naturally cooling to ambient temperature, the black powder product was successfully obtained.

In addition, CeO<sub>2</sub> were fabricated under the same experimental conditions except without the involvement of nickel precursors.

### **Materials characterization**

The obtained sample was characterized by a field-emission scanning electron microscope (SEM, FEI Inspect F50) coupled with an energy dispersive spectrometer (EDS) analyzer, a transmission electron microscope (TEM, FEI Tecnai G2 Spirit TWIN). The phase and composition of the sample were analyzed by a X-ray diffractometer with Cu K<sub>α</sub> ( $\lambda = 1.5406 \text{ \AA}$ ) radiation (XRD, PANalytical B.V.). X-ray photoelectron spectroscopy (XPS, Thermo Scientific Escalab 250xi) was employed to analyze the valence state of the element on the surface of samples. Nitrogen absorption/desorption analysis was carried out on a BET surface-area and pore-size analyzer (Micromeritics ASPA 2020) to acquire the specific surface area and pore size distribution.

### **Electrochemical Measurements**

The electrochemical test was accomplished on a CS150H Electrochemical Workstation using a typical three-electrode configuration. An iR-correction was used for all the electrochemical tests. A carbon cloth (CC) electrode was used as the working electrode, a graphite rod was used as a counter electrode and saturated calomel electrode (SCE) was used as a reference electrode. To prepare the

working electrode, 6.0 mg of the catalyst were ultrasonically dispersed for 20 min in a mixture solvent containing 300  $\mu\text{L}$  ethanol and 100.0  $\mu\text{L}$  Nafion (5 wt%) solution. Afterward, 50  $\mu\text{L}$  of the above suspension was dropped onto the CC electrode (loading amount: 1  $\text{mg cm}^{-2}$ ) and then dried at room temperature. The electrochemical measurements were executed in 1 M KOH electrolyte. All potentials were converted to a reversible hydrogen electrode (RHE) based on the following equation:  $E_{\text{RHE}} = E_{\text{SCE}} + 0.0592\text{pH} + 0.241$ . The linear sweep voltammetry (LSV) curves for HER were recorded in the potential range of -0.73 - 0.07 V (vs. RHE) with a scan rate of 5  $\text{mV s}^{-1}$ . The chronopotentiometric measurements for HER were performed at a constant current density of 10  $\text{mA cm}^{-2}$  for up to 50 h. The cycle voltammetry (CV) curves for HER were recorded in the potential range of 1.10 - 1.20 V (vs. RHE) at different scan rates (from 20 to 120  $\text{mV s}^{-1}$ ) to evaluate the active surface area of the catalyst. Electrochemical impedance spectra (EIS) were tested at the applied potential corresponding to the potential of -0.72 V (vs. RHE) for HER within frequency window ranging from 100 kHz to 0.01 Hz.

#### **Calculation of Electrochemical active surface area (ECSA) for each catalyst**

In order to obtain the ECSA of the working electrode, the specific capacitance of the flat surface is usually in the range of 20-60  $\mu\text{F cm}^{-2}$ , we choose the median value of 40  $\mu\text{F cm}^{-2}$  as the calculation standard. The roughness factor ( $R_f$ ) is first obtained according to the equation:  $R_f = C_{\text{dl}}/40 \mu\text{F cm}^{-2}$ . The electrochemically active surface area is directly obtained by the equation:  $\text{ECSA} = R_f S$ , where  $S$  is usually equal to the geometrical area of the electrode (here  $S = 0.5 \text{ cm}^2$ ).

#### **Calculation of Turnover frequency (TOF) for each catalyst**

The TOF value is calculated according to the following formula:

$$\text{TOF} = \frac{ImFA}{4RT \cdot \text{slope}}$$

Where  $I$  is the current during the linear sweep voltammetry test (the unit is A).  $m$  represents the electro transfer numbers in HER and OER, which are 2 and 4 respectively.  $F$  is Faraday's constant (the unit is  $\text{C mol}^{-1}$ ) and  $A$  is the geometric area of the electrode ( $0.5 \text{ cm}^2$ ).  $R$  is the gas constant and  $T$  is absolute temperature. slope is the linear relationship between the oxidation peak and the scanning rate in electrochemical cyclic voltammetry.

## Supplementary Figures and Tables

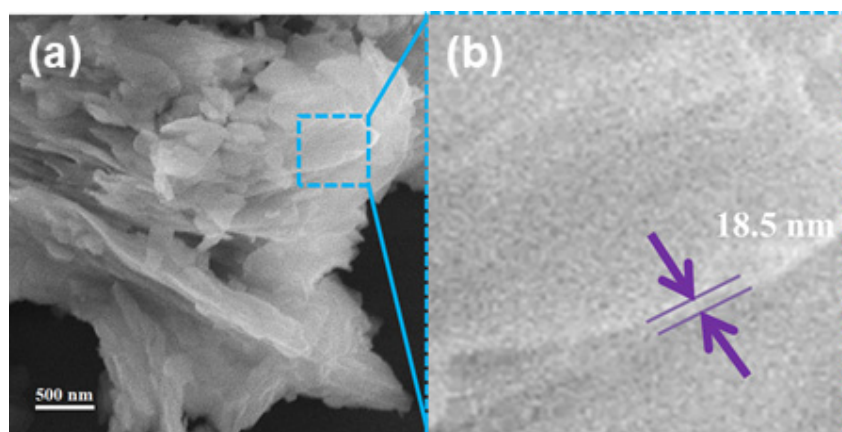

**Figure S1.** (a) SEM image of Ce-based coordination polymer. (b) Enlarged a cross-section image of light blue dotted box in (a).

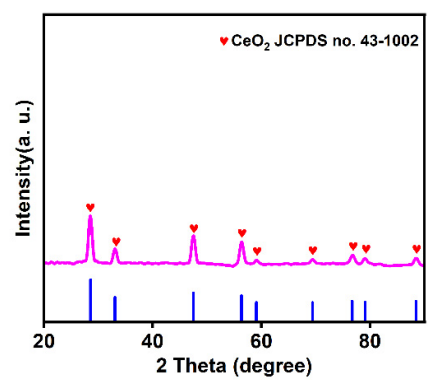

**Figure S2.** XRD pattern of CeO<sub>2</sub> NSs.

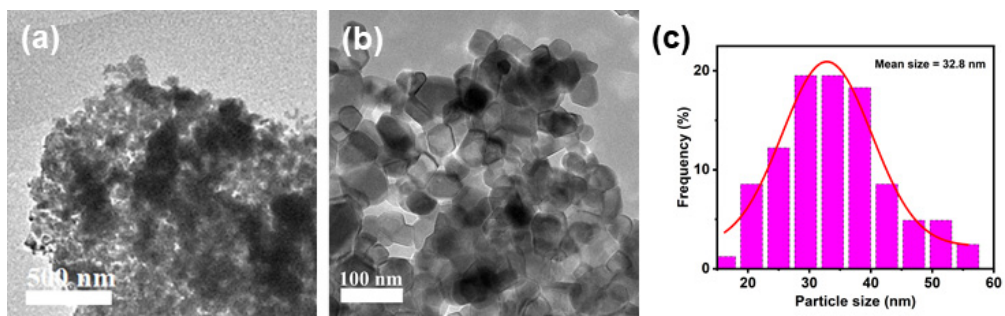

**Figure S3.** (a) TEM image, (b) enlarged TEM image, and (c) particle size distribution of Ni/CeO<sub>2</sub>.

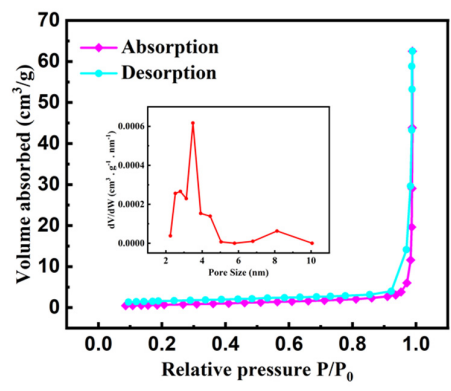

**Figure S4.** Nitrogen adsorption-desorption isotherms of Ni/CeO<sub>2</sub> HJ-NSs, pore size distribution (inset of S4).

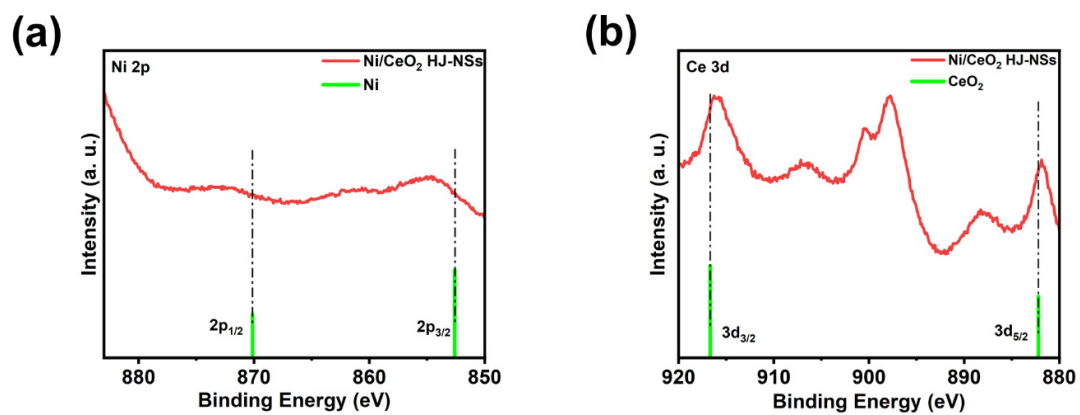

**Figure S5.** Comparisons of the (a) Ni 2p and (b) Ce 3d XPS spectra for different catalysts.

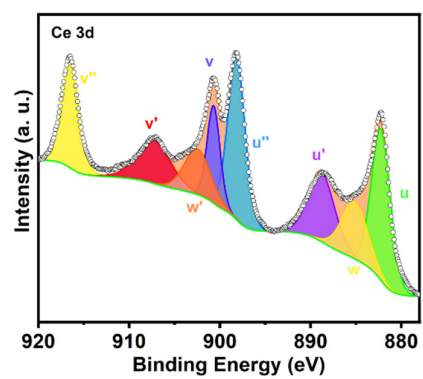

**Figure S6.** Deconvoluted Ce 3d XPS spectra for pure CeO<sub>2</sub> catalysts.

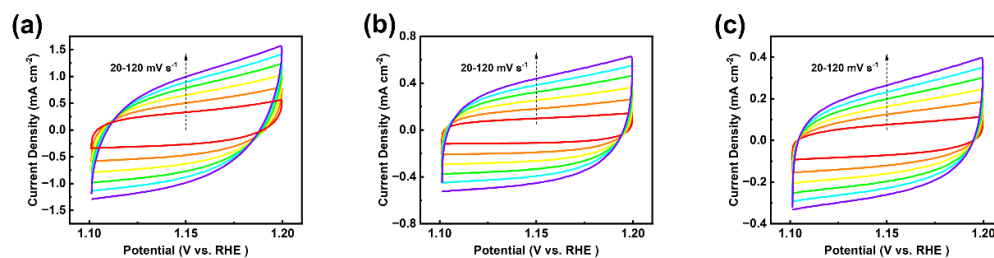

**Figure S7.** CV curves of different samples in the non-Faradaic region (1.10-1.20 V (vs. RHE)) obtained at different scanning rates. (a)  $\text{Ni/CeO}_2$  HJ-NSs, (b)  $\text{NiO/CeO}_2$  NSs, and (c)  $\text{CeO}_2$  NSs.

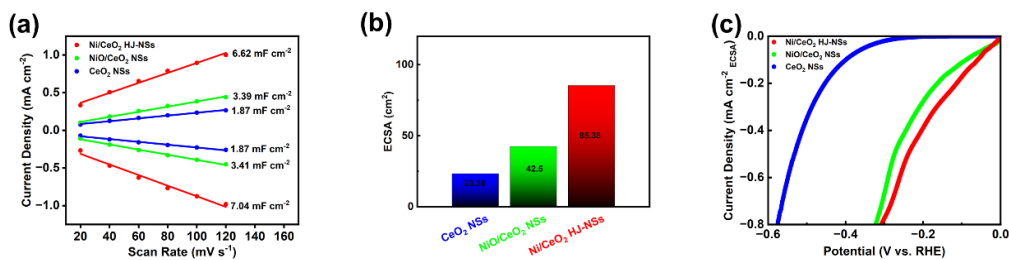

**Figure S8.** (a) The C<sub>dl</sub>, (b) corresponding ECSA, and (c) HER polarization curves with the current density normalized by ECSA of Ni/CeO<sub>2</sub> HJ-NSs, NiO/CeO<sub>2</sub> NSs and CeO<sub>2</sub> NSs.

### Calculation of ECSA for each catalyst:

$$A_{\text{ECSA}}^{\text{CeO}_2} = \frac{1870 \mu\text{F cm}^{-2} \times 0.5 \text{ cm}^2}{40 \mu\text{F cm}^{-2} \text{ per cm}^2_{\text{ECSA}}} = 23.38 \text{ cm}^2_{\text{ECSA}}$$

$$A_{\text{ECSA}}^{\text{NiO/CeO}_2} = \frac{3400 \mu\text{F cm}^{-2} \times 0.5 \text{ cm}^2}{40 \mu\text{F cm}^{-2} \text{ per cm}^2_{\text{ECSA}}} = 42.5 \text{ cm}^2_{\text{ECSA}}$$

$$A_{\text{ECSA}}^{\text{Ni/CeO}_2} = \frac{6830 \mu\text{F cm}^{-2} \times 0.5 \text{ cm}^2}{40 \mu\text{F cm}^{-2} \text{ per cm}^2_{\text{ECSA}}} = 85.38 \text{ cm}^2_{\text{ECSA}}$$

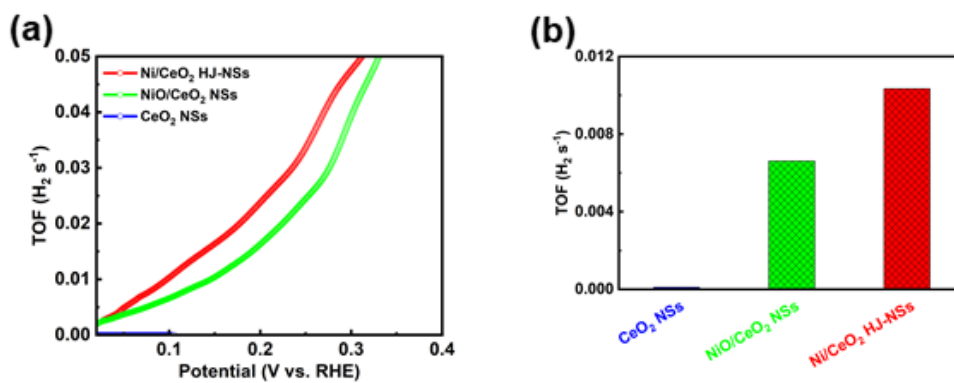

**Figure S9.** (a) TOF plots for Ni/CeO<sub>2</sub> HJ-NSs, NiO/CeO<sub>2</sub> NSs and CeO<sub>2</sub> NSs. (b) The TOF values at the overpotential of 0.1 V.

**Table S1** Elemental analysis of Ni, Ce (measured by ICP-OES) for CeO<sub>2</sub> HJ-NSs catalyst.

| Atomic %                   | Ni    | Ce    |
|----------------------------|-------|-------|
| Ni/CeO <sub>2</sub> HJ-NSs | 64.71 | 11.76 |

**Table S2** Comparison of HER performance in alkaline environment between Ni/CeO<sub>2</sub>

HJ-NSs and previously reported representative catalysts.

| Electrocatalysts                                                                     | Overpotential@<br>10 mA cm <sup>-2</sup><br>(mV) | Tafel slope<br>(mV dec <sup>-1</sup> ) | Electrolyte | Reference |
|--------------------------------------------------------------------------------------|--------------------------------------------------|----------------------------------------|-------------|-----------|
| Ni/CeO <sub>2</sub> HJ-NSs                                                           | 72                                               | 65                                     | 1.0 M KOH   | This work |
| Pt/C                                                                                 | 59                                               | 40                                     | 1.0 M KOH   | This work |
| OH-Ni/Ni <sub>3</sub> C                                                              | 72                                               | 106.3                                  | 1.0 M KOH   | 1         |
| Co/Mo <sub>2</sub> C@C                                                               | 98                                               | 68                                     | 1.0 M KOH   | 2         |
| Cu <sub>3</sub> N@CoNiCHs@CF                                                         | 182                                              | 134                                    | 1.0 M KOH   | 3         |
| MnCo-CH@NiFe-OH                                                                      | 177                                              | 97.8                                   | 1.0 M KOH   | 4         |
| Co <sub>9</sub> S <sub>8</sub> /Cu <sub>2</sub> S/CF                                 | 165                                              | 80.2                                   | 1.0 M KOH   | 5         |
| 0.02 Ni–MoP                                                                          | 162                                              | 102.6                                  | 1.0 M KOH   | 6         |
| Ni-Ni <sub>3</sub> C/CC                                                              | 98                                               | 88.5                                   | 1.0 M KOH   | 7         |
| MoS <sub>2</sub> /Co <sub>9</sub> S <sub>8</sub> /Ni <sub>3</sub> S <sub>2</sub> /Ni | 113                                              | 85                                     | 1.0 M KOH   | 8         |
| Ni-doped graphitic carbon                                                            | 220                                              | 64                                     | 1.0 M KOH   | 9         |
| Mo <sub>2</sub> C/N-PC                                                               | 100                                              | 94.5                                   | 1.0 M KOH   | 10        |
| CoP/NiCoP NTs                                                                        | 133                                              | 87                                     | 1.0 M KOH   | 11        |
| MoP/Mo <sub>2</sub> N                                                                | 89                                               | 78                                     | 1.0 M KOH   | 12        |
| Ni/NiCoP NHs                                                                         | 90                                               | 95                                     | 1.0 M KOH   | 13        |
| Co-Ni <sub>3</sub> N/CC                                                              | 194                                              | 156                                    | 1.0 M KOH   | 14        |
| Ni <sub>8</sub> A-MoS <sub>2</sub> /CC                                               | 98                                               | 75                                     | 1.0 M KOH   | 15        |
| CeO <sub>2</sub> /Ni-TMO                                                             | 93                                               | 69                                     | 1.0 M KOH   | 16        |
| N-doped Ni <sub>3</sub> S <sub>2</sub>                                               | 155                                              | 113                                    | 1.0 M KOH   | 17        |

## Reference

- (1) Wen, Q.; Duan, J.; Wang, W.; Huang, D.; Liu, Y.; Shi, Y.; Fang, J.; Nie, A.; Li, H.; Zhai, T. Engineering a Local Free Water Enriched Microenvironment for Surpassing Platinum Hydrogen Evolution Activity. *Angew. Chem. Int. Ed.*, e202206077.
- (2) Yuan, S.; Xia, M.; Liu, Z.; Wang, K.; Xiang, L.; Huang, G.; Zhang, J.; Li, N. Dual synergistic effects between Co and Mo<sub>2</sub>C in Co/Mo<sub>2</sub>C heterostructure for electrocatalytic overall water splitting. *Chem. Eng. J.* **2022**, *430*, 132697.
- (3) Liu, S.-Q.; Gao, M.-R.; Liu, S.; Luo, J.-L. Hierarchically assembling cobalt/nickel carbonate hydroxide on copper nitride nanowires for highly efficient water splitting. *Appl. Catal. B* **2021**, *292*, 120148.
- (4) Zeng, Y.; Cao, Z.; Liao, J.; Liang, H.; Wei, B.; Xu, X.; Xu, H.; Zheng, J.; Zhu, W.; Cavallo, L.; et al. Construction of hydroxide pn junction for water splitting electrocatalysis. *Appl. Catal. B* **2021**, *292*, 120160.
- (5) Zang, Z.; Wang, X.; Li, X.; Zhao, Q.; Li, L.; Yang, X.; Yu, X.; Zhang, X.; Lu, Z. Co<sub>9</sub>S<sub>8</sub> Nanosheet Coupled Cu<sub>2</sub>S Nanorod Heterostructure as Efficient Catalyst for Overall Water Splitting. *ACS Appl. Mater. Interfaces* **2021**, *13* (8), 9865-9874.
- (6) Xiao, W.; Zhang, L.; Bukhvalov, D.; Chen, Z.; Zou, Z.; Shang, L.; Yang, X.; Yan, D.; Han, F.; Zhang, T. Hierarchical ultrathin carbon encapsulating transition metal doped MoP electrocatalysts for efficient and pH-universal hydrogen evolution reaction. *Nano Energy* **2020**, *70*, 104445.
- (7) Wang, P.; Qin, R.; Ji, P.; Pu, Z.; Zhu, J.; Lin, C.; Zhao, Y.; Tang, H.; Li, W.; Mu, S. Synergistic Coupling of Ni Nanoparticles with Ni<sub>3</sub>C Nanosheets for Highly Efficient Overall Water Splitting. *Small* **2020**, *16* (37), 2001642.
- (8) Yang, Y.; Yao, H.; Yu, Z.; Islam, S. M.; He, H.; Yuan, M.; Yue, Y.; Xu, K.; Hao, W.; Sun, G.; et al. Hierarchical Nanoassembly of MoS<sub>2</sub>/Co<sub>9</sub>S<sub>8</sub>/Ni<sub>3</sub>S<sub>2</sub>/Ni as a Highly Efficient Electrocatalyst for Overall Water Splitting in a Wide pH Range. *J. Am. Chem. Soc.* **2019**, *141* (26), 10417-10430.
- (9) Zhou, B.; Zhang, M.; He, W.; Wang, H.; Jian, M.; Zhang, Y. Blue rose-inspired approach towards highly graphitic carbons for efficient electrocatalytic water splitting. *Carbon* **2019**, *150*, 21-26.
- (10) Han, W.; Chen, L.; Ma, B.; Wang, J.; Song, W.; Fan, X.; Li, Y.; Zhang, F.; Peng, W. Ultra-small Mo<sub>2</sub>C nanodots encapsulated in nitrogen-doped porous carbon for pH-universal hydrogen evolution: insights into the synergistic enhancement of HER activity by nitrogen doping and structural defects. *J. Mater. Chem. A* **2019**, *7* (9), 4734-4743.
- (11) Lin, Y.; Sun, K.; Liu, S.; Chen, X.; Cheng, Y.; Cheong, W.-C.; Chen, Z.; Zheng, L.; Zhang, J.; Li, X.; et al. Construction of CoP/NiCoP Nanotadpoles Heterojunction Interface for Wide pH Hydrogen Evolution Electrocatalysis and Supercapacitor. *Adv. Energy Mater.* **2019**, *9* (36), 1901213.
- (12) Gu, Y.; Wu, A.; Jiao, Y.; Zheng, H.; Wang, X.; Xie, Y.; Wang, L.; Tian, C.; Fu, H. Two-Dimensional Porous Molybdenum Phosphide/Nitride Heterojunction Nanosheets for pH-Universal Hydrogen Evolution Reaction. *Angew. Chem. Int. Ed.* **2021**, *60* (12), 6673-6681.
- (13) Lin, Y.; Pan, Y.; Liu, S.; Sun, K.; Cheng, Y.; Liu, M.; Wang, Z.; Li, X.; Zhang, J. Construction of multi-dimensional core/shell Ni/NiCoP nano-heterojunction for efficient electrocatalytic water splitting. *Appl. Catal. B* **2019**, *259*, 118039.
- (14) Zhu, C.; Wang, A.-L.; Xiao, W.; Chao, D.; Zhang, X.; Tiep, N. H.; Chen, S.; Kang, J.; Wang, X.; Ding, J.; et al. In Situ Grown Epitaxial Heterojunction Exhibits High-Performance Electrocatalytic Water Splitting. *Adv. Mater.* **2018**, *30* (13), 1705516.

- (15) Wang, Q.; Zhao, Z. L.; Dong, S.; He, D.; Lawrence, M. J.; Han, S.; Cai, C.; Xiang, S.; Rodriguez, P.; Xiang, B.; et al. Design of active nickel single-atom decorated MoS<sub>2</sub> as a pH-universal catalyst for hydrogen evolution reaction. *Nano Energy* **2018**, *53*, 458-467.
- (16) Long, X.; Lin, H.; Zhou, D.; An, Y.; Yang, S. Enhancing Full Water-Splitting Performance of Transition Metal Bifunctional Electrocatalysts in Alkaline Solutions by Tailoring CeO<sub>2</sub> –Transition Metal Oxides–Ni Nanointerfaces. *ACS Energy Lett.* **2018**, *3* (2), 290-296.
- (17) Kou, T.; Smart, T.; Yao, B.; Chen, I.; Thota, D.; Ping, Y.; Li, Y. Theoretical and Experimental Insight into the Effect of Nitrogen Doping on Hydrogen Evolution Activity of Ni<sub>3</sub>S<sub>2</sub> in Alkaline Medium. *Adv. Energy Mater.* **2018**, *8* (19), 1703538.
